# Supplementary material
Source: HighWire-hosted journal article supplement (https://cmajopen.ca/highwire/filestream/90394/field_highwire_adjunct_files/0/open-2022-0211-1-at.pdf)
Supplement: open-2022-0211-1-at.pdf [file open-2022-0211-1-at.pdf]

## **APPENDIX 1: Virtual groups used for participant recruitment**

The Facebook groups that permitted advertisement of the study were:

- Surviving Chronic Pain in Canada (1.7K members)
- Mental Health Support in Canada (1.3K members)
- Canadian Cancer Support Group (550 members)
- Rheumatoid Arthritis Canada (2.5K members)
- Asthma Support for Canadians (279 members)
- Canadian Disability Alliance (1.5K members)
- Disability/Special Needs Benefits in Canada (1.5K members)

Due to a paucity of male participants, recruitment was expanded off Facebook through the Prostate Cancer Support Canada e-newsletter.
